# Supplementary material
Source: PubMed Central journal article supplement (PMC7539544)
Supplement: NIHMS1632302-supplement-1.pdf [file NIHMS1632302-supplement-1.pdf]

**Supplemental Data**

**Table 1. Patient Survey Elements Regarding Perceptions of Statin Medications**

| Question                                                                                                         | Response Choices                                                                                                                                                                                                                                                                                     |
|------------------------------------------------------------------------------------------------------------------|------------------------------------------------------------------------------------------------------------------------------------------------------------------------------------------------------------------------------------------------------------------------------------------------------|
| People with high cholesterol are more likely to have a heart attack or stroke than people with low cholesterol.  | <p style="text-align: center;">Strongly Disagree<br/>Disagree<br/>Neither Agree or Disagree<br/>Agree, Strongly Agree<br/>Don't Know/Not Sure</p>                                                                                                                                                    |
| People don't need to worry about their cholesterol if they have never had a heart attack or other heart problem. |                                                                                                                                                                                                                                                                                                      |
| Statin medications are effective in reducing the risk of heart disease and stroke                                |                                                                                                                                                                                                                                                                                                      |
| Statins are safe medications                                                                                     |                                                                                                                                                                                                                                                                                                      |
| I think statins can cause diabetes                                                                               |                                                                                                                                                                                                                                                                                                      |
| I think statins can cause muscle aches or pain                                                                   |                                                                                                                                                                                                                                                                                                      |
| I think statins can cause hair loss                                                                              |                                                                                                                                                                                                                                                                                                      |
| I think statins can cause liver damage                                                                           |                                                                                                                                                                                                                                                                                                      |
| I think statins can cause memory loss                                                                            |                                                                                                                                                                                                                                                                                                      |
| I think statins can cause problems with sexual function                                                          |                                                                                                                                                                                                                                                                                                      |
| Have you experienced any of the following symptoms while taking a statin? Please select all that apply.          | <p style="text-align: center;">Muscle aches/cramps<br/>Memory loss, forgetfulness, confusion<br/>Weakness<br/>Nausea/vomiting/stomach upset<br/>Constipation<br/>Fatigue<br/>Hives/itching<br/>Other (free text)<br/>I have not experienced any symptoms<br/>I don't know/can't remember</p>         |
| Did you try any of these methods to reduce or avoid these symptoms? Please elect all that apply.                 | <p style="text-align: center;">Reduced the dose<br/>Reduced how often I take it<br/>Temporarily stopped taking it<br/>Switched to another statin<br/>Added another medication to help relieve side effects of statin (e.g. Coenzyme Q10)<br/>Reduced exercise<br/>Other<br/>I didn't do anything</p> |
